# Supplementary material for: Differentiating Dementia with Lewy Bodies from Alzheimer's Disease Using the Fall Risk Evaluation Questionnaire
Source: PubMed Central journal article supplement — Intern Med. 2021 Oct 26;61(11):1687–92. doi: 10.2169/internalmedicine.8383-21 (PMC9259302; doi:10.2169/internalmedicine.8383-21), 2021-10-26
Supplement: 1349-7235-61-1687-s001.pdf [file 1349-7235-61-1687-s001.pdf]

**Supplemental Table 1. Demographic Data of the Participants in Group A: Physical Ability.**

| Characteristics          | Total (n = 2831) | AD (n = 2490) | DLB (n = 341) | P-value |
|--------------------------|------------------|---------------|---------------|---------|
| Sex, female (%)          | 69.5             | 70.7          | 60.7          |         |
| Age (years)              | 78.87 (6.97)     | 78.83 (7.06)  | 79.14 (6.31)  | N.S.    |
| BMI (kg/m <sup>2</sup> ) | 21.76 (3.45)     | 21.75 (3.40)  | 21.80 (3.86)  | N.S.    |
| MMSE                     | 17.94 (4.98)     | 17.92 (4.93)  | 18.10 (5.34)  | N.S.    |
| GDS                      | 3.98 (2.94)      | 3.85 (2.89)   | 5.01 (3.14)   | <0.01   |
| BI                       | 93.24 (13.41)    | 94.04 (12.27) | 87.26 (18.93) | <0.01   |
| IADL                     |                  |               |               |         |
| Male                     | 2.90 (1.41)      | 2.97 (1.40)   | 2.55 (1.42)   | <0.01   |
| Female                   | 5.08 (2.12)      | 5.16 (2.09)   | 4.38 (2.23)   | <0.01   |
| Frailty (%)              | 21.80            | 20.00         | 34.60         | <0.01   |

Data are presented as the mean (standard deviation) or %. AD: Alzheimer's disease, BI: Barthel Index, BMI: body mass index, DLB: dementia with Lewy bodies, GDS: Geriatric Depression Scale, IADL: Instrumental Activities of Daily Living, MMSE: Mini-Mental State Examination, N.S.: not significant.  $P < 0.01$ : statistically significant difference between the AD and DLB groups.
