# Supplementary material for: Differentiating Dementia with Lewy Bodies from Alzheimer's Disease Using the Fall Risk Evaluation Questionnaire
Source: PubMed Central journal article supplement — Intern Med. 2021 Oct 26;61(11):1687–92. doi: 10.2169/internalmedicine.8383-21 (PMC9259302; doi:10.2169/internalmedicine.8383-21), 2021-10-26
Supplement: 1349-7235-61-1687-s002.pdf [file 1349-7235-61-1687-s002.pdf]

**Supplemental Table 2. Demographic Data of the Participants in Group B: Physical Ability, Age, and Cognitive Test Results.**

| Variables                | Total (n = 412) | AD (n = 367) | DLB (n = 45) | <i>P</i> -value |
|--------------------------|-----------------|--------------|--------------|-----------------|
| Sex, female (%)          | 64.6            | 66.2         | 51.1         |                 |
| Age (years)              | 69.26 (4.96)    | 69.20 (5.00) | 69.69 (4.70) | N.S.            |
| BMI (kg/m <sup>2</sup> ) | 21.63 (3.46)    | 21.62 (3.40) | 21.66 (3.97) | N.S.            |
| MMSE                     | 21.80 (2.74)    | 21.62 (2.58) | 23.29 (3.51) | <0.01           |
| GDS                      | 3.68 (2.64)     | 3.52 (2.50)  | 5.21 (3.35)  | <0.01           |
| BI                       | 98.19 (6.88)    | 98.42 (6.59) | 96.10 (8.91) | N.S.            |
| IADL                     |                 |              |              |                 |
| Male                     | 3.80 (0.98)     | 3.85 (0.96)  | 3.47 (1.07)  | N.S.            |
| Female                   | 6.47 (1.55)     | 6.50 (1.57)  | 6.19 (1.37)  | N.S.            |
| Frailty (%)              | 14.10           | 12.00        | 31.10        | <0.01           |

Data are presented as the mean (standard deviation) or %. AD: Alzheimer's disease, BI: Barthel Index, BMI: body mass index, DLB: dementia with Lewy bodies, GDS: Geriatric Depression Scale, IADL: Instrumental Activities of Daily Living, MMSE: Mini-Mental State Examination, N.S.: not significant.  $P < 0.01$ : statistically significant difference between the AD and the DLB groups.
