# Supplementary material for: Differentiating Dementia with Lewy Bodies from Alzheimer's Disease Using the Fall Risk Evaluation Questionnaire
Source: PubMed Central journal article supplement — Intern Med. 2021 Oct 26;61(11):1687–92. doi: 10.2169/internalmedicine.8383-21 (PMC9259302; doi:10.2169/internalmedicine.8383-21), 2021-10-26
Supplement: 1349-7235-61-1687-s003.pdf [file 1349-7235-61-1687-s003.pdf]

**Supplemental Table 3. Demographic Data of the Participants in Group C: Physical Ability, Age,****Cognition Test Results, and Percentage of Fall Events.**

| Variables                | Total (n = 301) | AD (n = 275) | DLB (n = 26)  | <i>P</i> -value |
|--------------------------|-----------------|--------------|---------------|-----------------|
| Sex, female (%)          | 64.5            | 65.8         | 60.0          |                 |
| Age                      | 68.76 (5.21)    | 68.82 (5.21) | 68.12 (5.31)  | N.S.            |
| BMI (kg/m <sup>2</sup> ) | 21.48 (3.40)    | 21.50 (3.10) | 21.29 (4.29)  | N.S.            |
| MMSE                     | 21.93 (2.64)    | 21.79 (2.49) | 23.46 (3.56)  | 0.03            |
| GDS                      | 3.53 (2.65)     | 3.35 (2.48)  | 5.48 (3.60)   | <0.01           |
| BI                       | 98.77 (5.92)    | 99.10 (5.22) | 95.38 (10.39) | N.S.            |
| IADL                     |                 |              |               |                 |
| Male                     | 3.91 (0.91)     | 3.95 (0.88)  | 3.62 (1.12)   | N.S.            |
| Female                   | 6.69 (1.34)     | 6.68 (1.36)  | 6.85 (1.07)   | N.S.            |
| Frailty (%)              | 11.30           | 9.50         | 30.80         | <0.01           |

Data are presented as the mean (standard deviation) or %. AD: Alzheimer's disease, BI: Barthel Index, BMI: body mass index, DLB: dementia with Lewy bodies, GDS: Geriatric Depression Scale, IADL: Instrumental Activities of Daily Living, MMSE: Mini-Mental State Examination, N.S.: not significant.  $P < 0.01$ : statistically significant difference between the AD and the DLB groups.
